# Supplementary material for: Influence of Reproductive Status: Home Range Size in Water Voles (Arvicola amphibius)
Source: PubMed Central journal article supplement (PMC4846030; doi:10.1371/journal.pone.0154338), 2016-04-26
Supplement: pone.0154338.s001.pdf [file pone.0154338.s001.pdf]

| ID  | Year | Month(s)        | Age            | Sex    | N tracking days | N sessions | Fixes per session | Overall home range | Session home ranges | Weight      | Fate                    |
|-----|------|-----------------|----------------|--------|-----------------|------------|-------------------|--------------------|---------------------|-------------|-------------------------|
| 497 | 2006 | June/July/Sept. | Adult          | Female | 33              | 3          | 539/481/322       | 1581               | 1029/1340/1136      | 232         | Alive                   |
| 491 | 2006 | June/July       | Adult          | Female | 24              | 2          | 539/468           | 932                | 747/654             | 189/191     | Transmitter removed     |
| 484 | 2006 | June/July       | Adult          | Female | 23              | 2          | 468/481           | 1326               | 953/1326            | 209         | Alive                   |
| 566 | 2007 | June/July       | Adult          | Male   | 32              | 2          | 375/367           | 3142               | 2653/1708           | 242         | Transmitter lost, alive |
| 545 | 2007 | June/July       | Adult          | Male   | 35              | 2          | 372/365           | 3285               | 2929/858            | 229/217     | Transmitter removed     |
| 873 | 2007 | June/July       | Adult          | Male   | 33              | 3          | 365/366/96        | 3069               | 3014/1888           | 219/213     | Transmitter removed     |
| 468 | 2007 | June/July       | Adult          | Male   | 29              | 2          | 362/365/19        | 2378               | 2142/1738           | 234/230     | Transmitter removed     |
| 586 | 2007 | June/July       | Adult          | Female | 32              | 3          | 321/367/92        | 1012               | 483/924             | 253/215     | Transmitter removed     |
| 366 | 2007 | June/July       | Adult          | Female | 27              | 2          | 309/365           | 654                | 654/654             | 237         | Predated                |
| 906 | 2007 | June-Sept.      | Adult          | Male   | 51              | 4          | 365/366/350/239   | 1698               | 1698/1698/1698      | 235/208     | Transmitter removed     |
| 345 | 2007 | July            | Adult          | Female | 14              | 1          | 350               | 1023               |                     | 229         | Predated                |
| 324 | 2007 | July            | Adult          | Female | 12              | 1          | 349               | 1124               |                     | 229         | Predated                |
| 444 | 2007 | July            | Adult          | Male   | 14              | 1          | 348               | 1446               |                     | 214         | Dead in situ            |
| 377 | 2007 | July            | Adult          | Female | 14              | 1          | 344               | 577                |                     | 212         | Predated                |
| 296 | 2007 | Aug./Sept.      | Juvenile       | Male   | 23              | 2          | 326/244           | 239                |                     | 152/168     | Transmitter removed     |
| 417 | 2007 | Aug./Sept.      | Adult          | Female | 22              | 2          | 296/250           | 780                | 780/780             | 199/198/202 | Transmitter removed     |
| 437 | 2007 | Aug./Sept.      | Juvenile       | Female | 22              | 2          | 282/250           | 482                |                     | 162/162     | Transmitter removed     |
| 324 | 2007 | Aug./Sept.      | Juvenile       | Male   | 21              | 2          | 279/81            | 356                |                     | 154/167/161 | Transmitter removed     |
| 377 | 2007 | Aug./Sept.      | Juvenile       | Male   | 19              | 2          | 226/240           | 722                |                     | 145/159     | Transmitter removed     |
| 345 | 2007 | Sept.           | Juvenile       | Male   | 9               | 1          | 269               | 268                |                     | 153/162     | Transmitter removed     |
| 906 | 2008 | May             | Adult          | Male   | 11              | 1          | 270               | 3640               |                     | 200         | Predated                |
| 873 | 2008 | May/June        | Adult          | Male   | 34              | 3          | 261/278/278       | 4134               | 2601/3511/2583      | 271/216/214 | Transmitter removed     |
| 345 | 2008 | May/June        | Adult          | Male   | 23              | 2          | 240/297           | 1921               | 1846/1309           | 215/215     | Transmitter removed     |
| 377 | 2008 | May/June        | Adult          | Male   | 35              | 3          | 285/298           | 2859               | 3188/1162/493       | 192/181     | Transmitter removed     |
| 297 | 2008 | May/June        | Adult          | Male   | 22              | 2          | 279/296           | 2310               | 1780/1796           | 205         | Dead in situ            |
| 323 | 2008 | May             | Adult          | Female | 12              | 1          | 299               | 568                |                     | 232/214     | Transmitter removed     |
| 365 | 2008 | May/June        | Adult          | Female | 23              | 2          | 288/298           | 600                | 326/504             | 221/198     | Transmitter removed     |
| 417 | 2008 | May/June        | Adult          | Female | 30              | 3          | 285/298/160       | 1442               | 644/1324/488        | 212/198     | Transmitter removed     |
| 906 | 2008 | June            | Adult          | Female | 11              | 1          | 278               | 336                |                     | 237         | Predated                |
| 437 | 2008 | July/Aug.       | Juvenile       | Female | 17              | 2          | 328/80            | 172                |                     | 143/148     | Transmitter removed     |
| 444 | 2008 | July/Aug.       | Juvenile       | Female | 17              | 2          | 322/82            | 546                |                     | 143/146     | Transmitter removed     |
| 468 | 2008 | July/Aug.       | Juvenile       | Female | 18              | 2          | 328/88            | 822                |                     | 184/188     | Transmitter removed     |
| 586 | 2008 | July/Aug.       | Juvenile       | Male   | 14              | 1          | 327               | 358                |                     | 150/155     | Predated                |
| 545 | 2008 | July/Aug.       | Juvenile       | Male   | 17              | 2          | 326/87            | 335                |                     | 142/163     | Transmitter removed     |
| 566 | 2008 | July/Aug.       | Juvenile       | Male   | 18              | 2          | 327/93            | 351                |                     | 143/166     | Transmitter removed     |
| 525 | 2008 | July/Aug.       | Juvenile       | Female | 17              | 2          | 314/89            | 356                |                     | 150/148     | Transmitter removed     |
| 468 | 2009 | April/May       | Subadult/adult | Male   | 17              | 2          | 211/110           | 525/3260           |                     | 267/224     | Transmitter removed     |
| 417 | 2009 | April/May       | Subadult/adult | Male   | 19              | 2          | 210/237           | 343/2898           |                     | 243/223     | Transmitter removed     |
| 444 | 2009 | April/May       | Subadult/adult | Male   | 20              | 2          | 213/280           | 127/2796           |                     | 185/218     | Transmitter removed     |
| 586 | 2009 | April/May       | Subadult/adult | Female | 20              | 2          | 224/268           | 127/328            |                     | 155/239     | Transmitter removed     |
| 604 | 2009 | April           | Subadult       | Male   | 9               | 1          | 211               | 318                |                     | 139         | Predated                |
| 545 | 2009 | April           | Subadult       | Male   | 9               | 1          | 209               | 51                 |                     | 122         | Predated, Excluded      |
| 437 | 2009 | April/May       | Subadult       | Male   | 14              | 1          | 224               | 420                |                     | 140/-       | Transmitter removed     |
| 525 | 2009 | April/May       | Subadult/adult | Female | 21              | 2          | 224/265           | 274/462            |                     | 130/189     | Transmitter removed     |
