# Supplementary material for: Influence of Reproductive Status: Home Range Size in Water Voles (Arvicola amphibius)
Source: PubMed Central journal article supplement (PMC4846030; doi:10.1371/journal.pone.0154338), 2016-04-26
Supplement: pone.0154338.s002.pdf [file pone.0154338.s002.pdf]

| <b>Year</b> | <b>ID vole A</b> | <b>ID vole B</b> | <b>Overlapp</b> | <b>Sex</b> | <b>Age</b> |
|-------------|------------------|------------------|-----------------|------------|------------|
| 2006        | 497              | 417              | 413             | Females    | Adults     |
| 2006        | 497              | 484              | 52              | Females    | Adults     |
| 2007        | 586              | 324              | 170             | Females    | Adults     |
| 2007        | 366              | 586              | 1808            | Females    | Adults     |
| 2007        | 324              | 345              | 918             | Females    | Adults     |
| 2007        | 377              | 586              | 56              | Females    | Adults     |
| 2007        | 586              | 345              | 215             | Females    | Adults     |
| 2007        | 377              | 345              | 354             | Females    | Adults     |
| 2007        | 377              | 324              | 477             | Females    | Adults     |
| 2007        | 417              | 345              | 37              | Females    | Adults     |
| 2007        | 417              | 324              | 71              | Females    | Adults     |
| 2007        | 566              | 454              | 2232            | Males      | Adults     |
| 2007        | 444              | 873              | 406             | Males      | Adults     |
| 2007        | 468              | 873              | 417             | Males      | Adults     |
| 2007        | 906              | 566              | 202             | Males      | Adults     |
| 2007        | 444              | 468              | 548             | Males      | Adults     |
| 2007        | 545              | 444              | 85              | Males      | Adults     |
| 2007        | 545              | 468              | 1059            | Males      | Adults     |
| 2007        | 566              | 468              | 695             | Males      | Adults     |
| 2007        | 566              | 444              | 344             | Males      | Adults     |
| 2007        | 906              | 545              | 682             | Males      | Adults     |
| 2007        | 906              | 468              | 242             | Males      | Adults     |
| 2008        | 297              | 345              | 64              | Males      | Adults     |
| 2008        | 297              | 377              | 252             | Males      | Adults     |
| 2008        | 377              | 345              | 320             | Males      | Adults     |
| 2008        | 873              | 345              | 446             | Males      | Adults     |
| 2008        | 873              | 906              | 871             | Males      | Adults     |
| 2008        | 906              | 345              | 139             | Males      | Adults     |
| 2008        | 365              | 323              | 271             | Females    | Adults     |
| 2008        | 906              | 323              | 1               | Females    | Adults     |
| 2009        | 417              | 468              | 250             | Males      | Subadults  |
| 2009        | 417              | 545              | 2               | Males      | Subadults  |
| 2009        | 417              | 604              | 49              | Males      | Subadults  |
| 2009        | 437              | 604              | 263             | Males      | Subadults  |
| 2009        | 437              | 545              | 37              | Males      | Subadults  |
| 2009        | 545              | 604              | 51              | Males      | Subadults  |
| 2009        | 468              | 604              | 140             | Males      | Subadults  |
| 2009        | 468              | 545              | 4               | Males      | Subadults  |
| 2009        | 417              | 444              | 33              | Males      | Adults     |
| 2009        | 444              | 468              | 242             | Males      | Adults     |
| 2007        | 377              | 437              | 272             | –          | Juveniles  |
| 2008        | 444              | 468              | 460             | –          | Juveniles  |
| 2008        | 444              | 545              | 31              | –          | Juveniles  |
| 2008        | 468              | 545              | 29              | –          | Juveniles  |
| 2008        | 566              | 545              | 307             | –          | Juveniles  |
| 2008        | 566              | 468              | 46              | –          | Juveniles  |
| 2008        | 566              | 444              | 38              | –          | Juveniles  |
| 2008        | 586              | 566              | 314             | –          | Juveniles  |
| 2008        | 586              | 545              | 320             | –          | Juveniles  |
| 2008        | 586              | 525              | 3               | –          | Juveniles  |
| 2008        | 586              | 468              | 42              | –          | Juveniles  |
| 2008        | 586              | 444              | 41              | –          | Juveniles  |
